# Supplementary material
Source: ML conference proceedings conference paper supplement (https://aclanthology.org/D19-1329)
Supplement: Attachment [file D19-1329.Attachment.zip]

## A Detailed Results for MORPH

| Language         | DevSet     | DevLang            |
|------------------|------------|--------------------|
| adyghe           | 89.2 (263) | 84.8 (324)         |
| albanian         | 27.9 (400) | 24.8 (324)         |
| arabic           | 34.1 (397) | 31.7 (324)         |
| armenian         | 52.2 (393) | 50.9 (323.1111111) |
| asturian         | 71.2 (348) | 69 (324)           |
| azeri            | 64 (217)   | 46 (324)           |
| bashkir          | 80.1 (474) | 78.1 (324)         |
| basque           | 7.9 (282)  | 8.5 (334.2222222)  |
| belarusian       | 22.1 (198) | 25.4 (324)         |
| bengali          | 56 (585)   | 59 (324)           |
| breton           | 56 (263)   | 58 (324)           |
| bulgarian        | 50.3 (266) | 45.9 (324)         |
| catalan          | 64 (319)   | 61.5 (324)         |
| classical-syriac | 93 (285)   | 93 (324)           |
| cornish          | 32 (267)   | 32 (324)           |
| crimean-tatar    | 90 (458)   | 89 (324)           |
| czech            | 37.2 (592) | 35.4 (324)         |
| danish           | 64.5 (409) | 61.2 (324)         |
| dutch            | 54.1 (362) | 48.2 (324)         |
| english          | 87.3 (292) | 83.8 (324)         |
| estonian         | 31 (536)   | 30.1 (324)         |
| faroes           | 34 (310)   | 31.2 (324)         |
| finnish          | 21.5 (799) | 14.9 (324)         |
| french           | 55.1 (881) | 54.5 (324)         |
| friulian         | 72 (247)   | 72 (324)           |
| galician         | 44 (230)   | 41.9 (324.4444444) |
| georgian         | 77.2 (353) | 76.1 (303.5555556) |
| german           | 52.3 (384) | 48 (324)           |
| greek            | 25.6 (300) | 24.5 (324)         |
| greenlandic      | 74 (167)   | 76 (331.6666667)   |
| haida            | 58 (298)   | 57 (324)           |
| hebrew           | 31.3 (268) | 31 (324)           |
| hindi            | 75 (594)   | 73.5 (324)         |
| hungarian        | 39.5 (395) | 38 (324)           |
| icelandic        | 33.9 (250) | 31.6 (319.8888889) |
| ingrian          | 50 (263)   | 46 (324)           |
| irish            | 23.7 (493) | 20.9 (324)         |
| italian          | 45.6 (549) | 44.3 (324)         |
| kabardian        | 89 (233)   | 86 (341.4444444)   |
| kannada          | 52 (93)    | 56 (349.2222222)   |
| karelian         | 88 (147)   | 92 (324)           |
| kashubian        | 52 (263)   | 54 (324)           |
| kazakh           | 82 (287)   | 84 (324)           |
| khakas           | 82 (148)   | 80 (324)           |
| khaling          | 23.1 (742) | 22.4 (324)         |
| kurmanji         | 81.9 (470) | 78.8 (324)         |
| ladin            | 66 (236)   | 70 (324)           |
| latin            | 14.4 (478) | 10.2 (315.8888889) |
| latvian          | 35.3 (397) | 34.3 (324)         |
| lithuanian       | 15.8 (447) | 14 (296.5555556)   |
| livonian         | 31 (134)   | 32 (324)           |

Table 6: Detailed results per language for MORPH; corresponding epochs in parenthesis; part 1.

| Language            | DevSet     | DevLang    |
|---------------------|------------|------------|
| lower-sorbian       | 42 (590)   | 38.8 (324) |
| macedonian          | 56.8 (508) | 55.3 (324) |
| maltese             | 26 (189)   | 27 (324)   |
| mapudungun          | 86 (107)   | 90 (324)   |
| middle-french       | 82.9 (236) | 77.1 (324) |
| middle-high-german  | 80 (223)   | 78 (324)   |
| middle-low-german   | 36 (192)   | 38 (324)   |
| murrinhpatha        | 38 (72)    | 48 (324)   |
| navajo              | 10.8 (368) | 9.8 (324)  |
| neapolitan          | 77 (301)   | 80 (324)   |
| norman              | 60 (148)   | 62 (324)   |
| northern-sami       | 18.7 (695) | 17.3 (324) |
| north-frisian       | 43 (386)   | 41 (324)   |
| norwegian-bokmaal   | 66.3 (273) | 63.2 (324) |
| norwegian-nynorsk   | 51.6 (385) | 44 (324)   |
| occitan             | 69 (183)   | 68 (324)   |
| old-armenian        | 31.6 (389) | 31.1 (324) |
| old-church-slavonic | 49 (134)   | 50 (324)   |
| old-english         | 22.7 (433) | 20.4 (324) |
| old-french          | 40.6 (352) | 39.1 (324) |
| old-irish           | 2 (78)     | 2 (324)    |
| old-saxon           | 25 (494)   | 25.8 (324) |
| pashto              | 36 (114)   | 40 (324)   |
| persian             | 51.2 (277) | 48.5 (324) |
| polish              | 31.3 (544) | 27 (324)   |
| portuguese          | 57.3 (319) | 56.9 (324) |
| quechua             | 58.7 (753) | 57.5 (324) |
| romanian            | 35.2 (531) | 32.4 (324) |
| russian             | 43.6 (320) | 43.3 (324) |
| sanskrit            | 50.7 (489) | 46.2 (324) |
| scottish-gaelic     | 76 (361)   | 66 (324)   |
| serbo-croatian      | 34.4 (533) | 28.4 (324) |
| slovak              | 41 (575)   | 40.1 (324) |
| slovene             | 47.4 (535) | 45.8 (324) |
| sorani              | 27.3 (677) | 24.3 (324) |
| spanish             | 54.3 (588) | 48.7 (324) |
| swahili             | 62 (298)   | 62 (324)   |
| swedish             | 63.7 (392) | 55.7 (324) |
| tatar               | 76 (191)   | 77 (324)   |
| telugu              | 98 (79)    | 98 (324)   |
| tibetan             | 36 (28)    | 46 (324)   |
| turkish             | 36.6 (299) | 36.7 (324) |
| turkmen             | 82 (115)   | 78 (324)   |
| ukrainian           | 33.8 (522) | 33 (324)   |
| urdu                | 66.6 (369) | 64.7 (324) |
| uzbek               | 93 (242)   | 92 (324)   |
| venetian            | 76.8 (210) | 76.8 (324) |
| votic               | 22 (342)   | 21 (324)   |
| welsh               | 48 (482)   | 48 (324)   |
| west-frisian        | 50 (153)   | 49 (324)   |
| yiddish             | 63 (198)   | 61 (324)   |
| zulu                | 32.3 (679) | 28 (324)   |

Table 7: Detailed results per language for MORPH; corresponding epochs in parenthesis; part 2.
